# Supplementary material for: Cyano-bridged coordination polymer gel as a precursor to a nanoporous In2O3–Co3O4 hybrid network for high-capacity and cycle-stable lithium storage
Source: Royal Society of Chemistry journal article supplement (doi:10.1039/c5nj01953b), 2015-01-01
Supplement: c5nj01953b1.pdf [file c5nj01953b1.pdf]

## New Journal of Chemistry

### Electronic Supplementary Information

# Cyano-Bridged Coordination Polymer Gel as a Precursor to Nanoporous $\text{In}_2\text{O}_3\text{--Co}_3\text{O}_4$ Hybrid Network for High-Capacity and Cycle-Stable Lithium Storage

Weiyu Zhang,<sup>§</sup> Jinjing Zhang,<sup>§</sup> Meiling Zhang, Chenxing Zhang, Anping Zhang,

Yiming Zhou, Yawen Tang and Ping Wu\*

Jiangsu Key Laboratory of New Power Batteries, Jiangsu Collaborative Innovation

Center of Biomedical Functional Materials, School of Chemistry and Materials

Science, Nanjing Normal University, Nanjing 210023, PR China.

\* E-mail: [zjuwuping@njnu.edu.cn](mailto:zjuwuping@njnu.edu.cn)

<sup>§</sup> Equal contribution to this work.

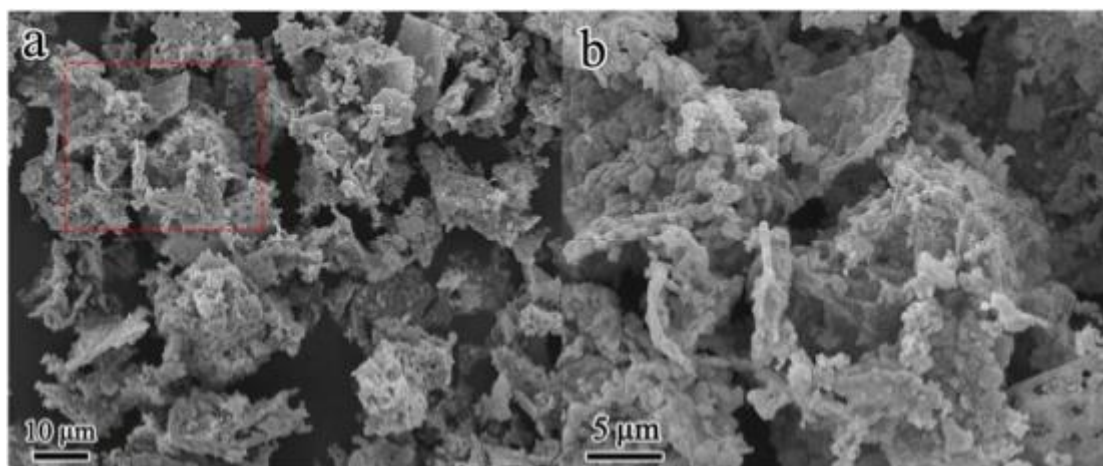

**Fig. S1** SEM images of the nanoporous  $\text{In}_2\text{O}_3\text{--Co}_3\text{O}_4$  hybrid network.

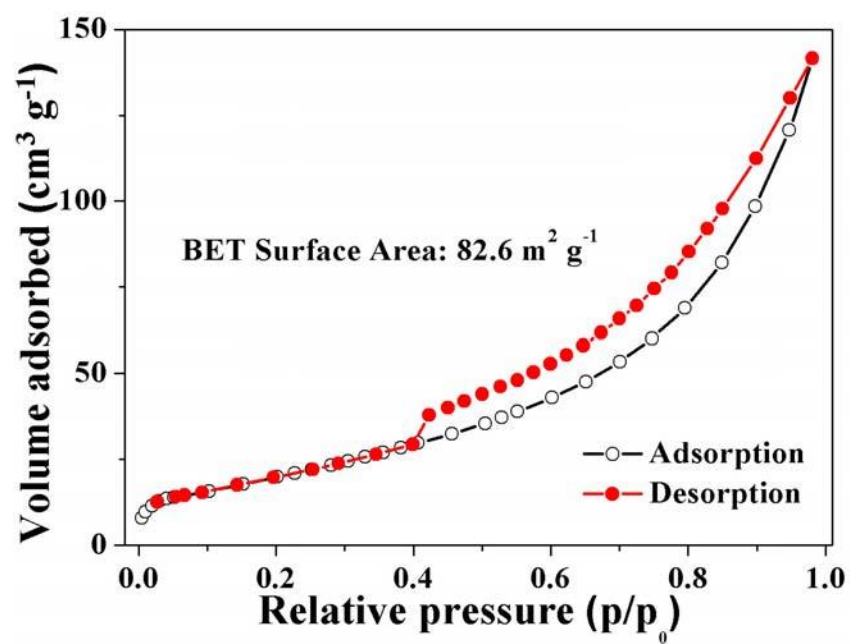

**Fig. S2** Nitrogen adsorption/desorption isotherms of the nanoporous In<sub>2</sub>O<sub>3</sub>-Co<sub>3</sub>O<sub>4</sub> hybrid network.

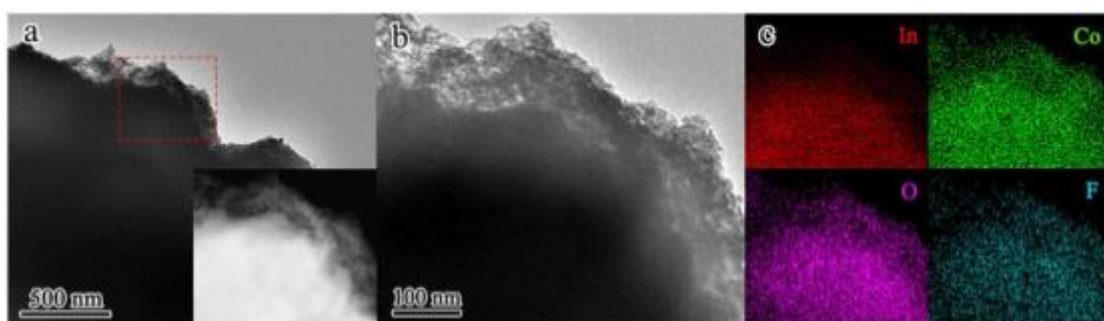

**Fig. S3** Morphological and compositional characterization of the nanoporous  $\text{In}_2\text{O}_3\text{--Co}_3\text{O}_4$  hybrid network in a fully delithiated state after 200 cycles: (a,b) TEM images and STEM image (inset), and (c) EDS elemental mappings of In (red), Co (green), O (purple), and F (cyan).

Fig. S3 displays the morphological and compositional characterization of the nanoporous  $\text{In}_2\text{O}_3\text{--Co}_3\text{O}_4$  hybrid network in a fully delithiated state (3.0 V vs.  $\text{Li}^+/\text{Li}$ ) after 200 cycles. As seen from the TEM images, the 3D porous structure is well preserved after repeated lithiation/de-lithiation processes, and the agglomeration and pulverization of hybrid oxide network can be effectively restrained during cycling (Fig. S3a and b). Also, the EDS elemental mappings reveal that the In, Co, and O signals are still uniformly distributed within the porous network, confirming the uniform distribution of indium, cobalt, and oxygen components in the delithiated product (Fig. S3c). Additionally, the homogeneous elemental signal of fluoride originates from the SEI layer on the anodic surface. These TEM and EDS elemental mapping results further demonstrate the excellent structural stability of the nanoporous  $\text{In}_2\text{O}_3\text{--Co}_3\text{O}_4$  hybrid network, which plays a key role in its improved Li-storage performance especially cycling stability.
